# Supplementary material for: Accelerated tumor growth under intermittent hypoxia is associated with hypoxia-inducible factor-1-dependent adaptive responses to hypoxia
Source: PubMed Central journal article supplement (PMC5617448; doi:10.18632/oncotarget.18644), 2017-06-27
Supplement: oncotarget-08-61592-s001.pdf [file oncotarget-08-61592-s001.pdf]

## Accelerated tumor growth under intermittent hypoxia is associated with hypoxia-inducible factor-1-dependent adaptive responses to hypoxia

### SUPPLEMENTARY FIGURE

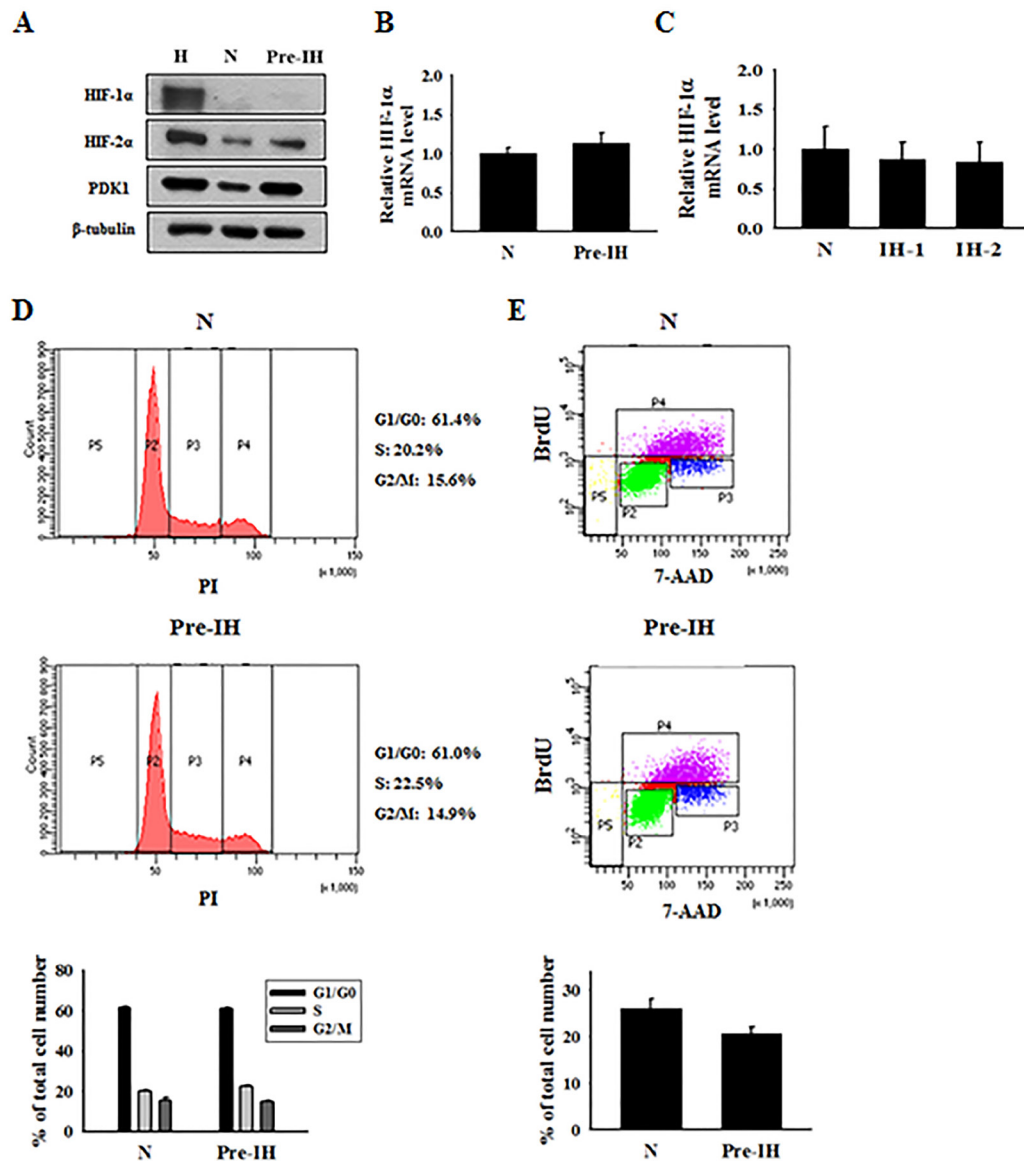

**Supplementary Figure 1: Characteristics of pre-intermittent hypoxia (Pre-IH) conditioned B16F10 cells before inoculation into mice and relative *HIF1A* mRNA expression in tumors from mice in the N or Pre-IH groups and N, IH-1, and IH-2 groups.** (A) A representative western blot image showing HIF-1 $\alpha$ , HIF-2 $\alpha$ , and PDK1 expression in extracts from cells subjected to 8 h of continuous hypoxia (H; 1% O<sub>2</sub>) and 7 days (84 cycles) of no conditioning (N), or Pre-IH. (B) Comparison of relative *HIF1A* mRNA expression levels in tumors from mice in the N or Pre-IH groups. (C) Comparisons of relative *HIF1A* mRNA expression in tumors from mice in the N, IH-1, and IH-2 groups. (D) Cell cycle analysis of B16F10 melanoma cells subjected to 7 days of N or Pre-IH by flow cytometry, using propidium iodide (n = 3 for each group). The graph represents the % of cells in each cell cycle stage. (E) BrdU-based cell-proliferation assay of B16F10 melanoma cells subjected to 7 days of N or Pre-IH (n = 3 for each group). The graph represents the % of BrdU-incorporating cells. The data are presented as the mean  $\pm$  S.E.M. Statistical significance was determined by the Mann-Whitney U test.
